# Supplementary material
Source: MDPI journal article supplement (https://www.mdpi.com/2073-4352/10/2/85)
Supplement: s1 [file s1]

## *Supplementary Materials*

# Coordination-induced Self-Assembly of a Heteroleptic Paddlewheel-type Dirhodium Complex

Kazuki Arakawa <sup>1</sup>, Natsumi Yano <sup>2</sup>, Nanako Imasaki,<sup>1</sup> Yoshihiro Kohara,<sup>1</sup> Daiki Yatsushiro <sup>1</sup>,  
Daiki Atarashi <sup>1</sup>, Makoto Handa <sup>1</sup>, and Yusuke Kataoka <sup>1,\*</sup>

<sup>1</sup> Department of Chemistry, Graduate School of Natural Science and Technology, Shimane University.

<sup>2</sup> Special Course of Science and Engineering, Graduate School of Natural Science and Technology, Shimane University.

### Contents

Figure S1. Optimized geometries of (a)  $[\text{Rh}_2(\text{O}_2\text{CCH}_3)_3(\text{PABC})]$ , (b)  $[\text{Rh}_2(\text{O}_2\text{CCH}_3)_3(\text{PABC})(\text{DMF})]$ , and (c)  $[\text{Rh}_2(\text{O}_2\text{CCH}_3)_3(\text{PABC})(\text{DMF})_2]$  (**1D**).

Figure S2. <sup>1</sup>H NMR spectrum of  $[\text{Rh}_2(\text{O}_2\text{CCH}_3)_3(\text{PABC})]$  (**1**) in DMF-*d*<sub>7</sub>.

Figure S3. <sup>1</sup>H NMR spectrum of  $[\text{Rh}_2(\text{O}_2\text{CCH}_3)_3(\text{PABC})]$  (**1**) in DMF-*d*<sub>7</sub>.

Figure S4. Observed (top) and simulated (down) ESI-TOF-MS spectra of  $[\text{Rh}_2(\text{O}_2\text{CCH}_3)_3(\text{PABC})]$  (**1**).

Figure S5. Packing view (along a axis) of crystal structure of  $[\text{Rh}_2(\text{O}_2\text{CCH}_3)_3(\text{PABC})(\text{DMF})]_n$  (**1P**). Hydrogen atoms are omitted for clarity.

Table S1. Coordinate of optimized geometry of  $[\text{Rh}_2(\text{O}_2\text{CCH}_3)_3(\text{PABC})]$ .

Table S2. Coordinate of optimized geometry of  $[\text{Rh}_2(\text{O}_2\text{CCH}_3)_3(\text{PABC})(\text{DMF})]$ .

Table S3. Coordinate of optimized geometry of  $[\text{Rh}_2(\text{O}_2\text{CCH}_3)_3(\text{PABC})(\text{DMF})_2]$ .

Table S4. Selected geometrical parameters of optimized geometries of  $[\text{Rh}_2(\text{O}_2\text{CCH}_3)_3(\text{PABC})]$ ,  $[\text{Rh}_2(\text{O}_2\text{CCH}_3)_3(\text{PABC})(\text{DMF})]$ , and  $[\text{Rh}_2(\text{O}_2\text{CCH}_3)_3(\text{PABC})(\text{DMF})_2]$  (**1D**).

Table S5. Sum of electronic and thermal free energies of optimized geometries of  $[\text{Rh}_2(\text{O}_2\text{CCH}_3)_3(\text{PABC})]$ ,  $[\text{Rh}_2(\text{O}_2\text{CCH}_3)_3(\text{PABC})(\text{DMF})]$ ,  $[\text{Rh}_2(\text{O}_2\text{CCH}_3)_3(\text{PABC})(\text{DMF})_2]$  (**1D**), and DMF.

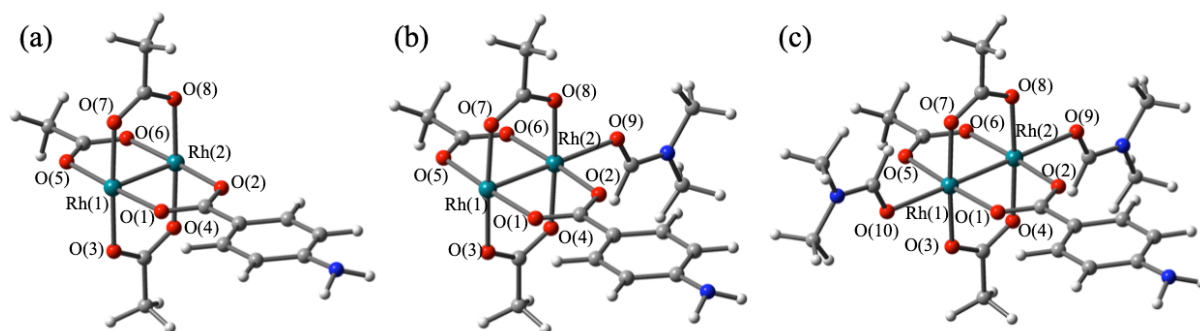

Figure S1. Optimized geometries of (a)  $[\text{Rh}_2(\text{O}_2\text{CCH}_3)_3(\text{PABC})]$ , (b)  $[\text{Rh}_2(\text{O}_2\text{CCH}_3)_3(\text{PABC})(\text{DMF})]$ , and (c)  $[\text{Rh}_2(\text{O}_2\text{CCH}_3)_3(\text{PABC})(\text{DMF})_2]$  (**1D**).

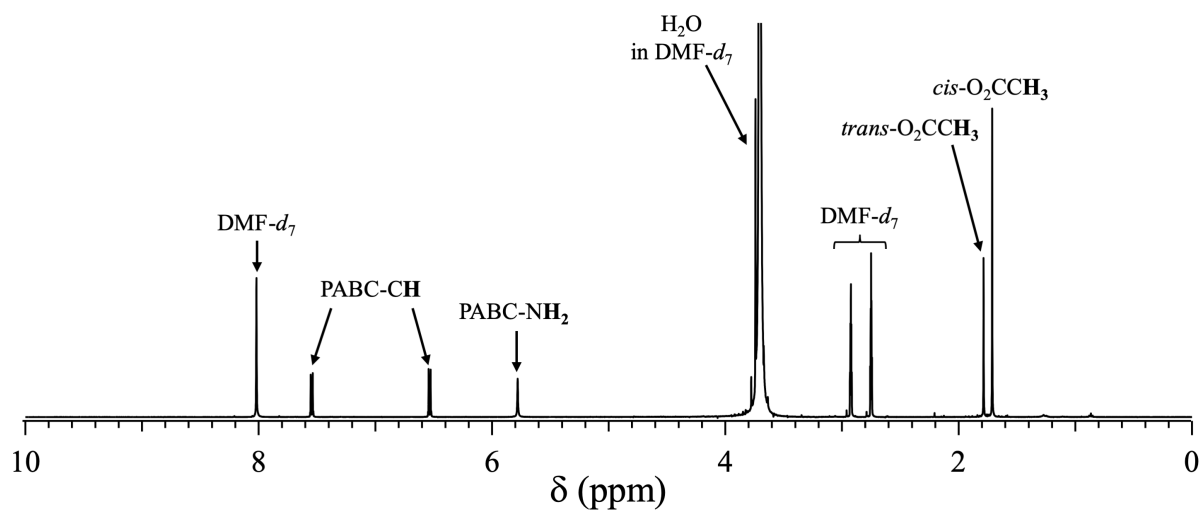

Figure S2.  $^1\text{H}$  NMR spectrum of  $[\text{Rh}_2(\text{O}_2\text{CCH}_3)_3(\text{PABC})]$  (**1**) in  $\text{DMF-}d_7$ .

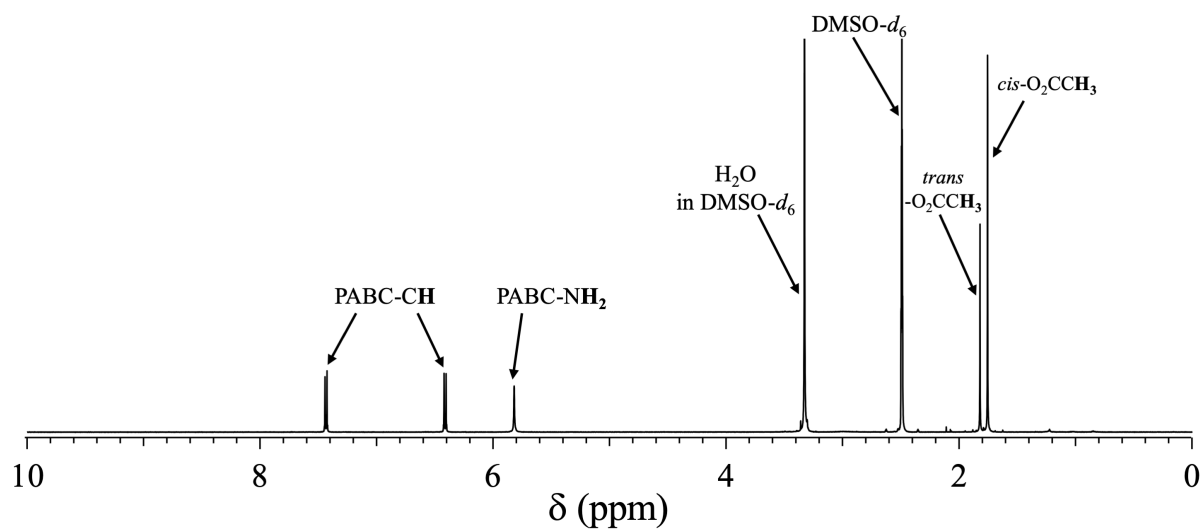

Figure S3.  $^1\text{H}$  NMR spectrum of  $[\text{Rh}_2(\text{O}_2\text{CCH}_3)_3(\text{PABC})]$  (**1**) in  $\text{DMF}-d_7$ .

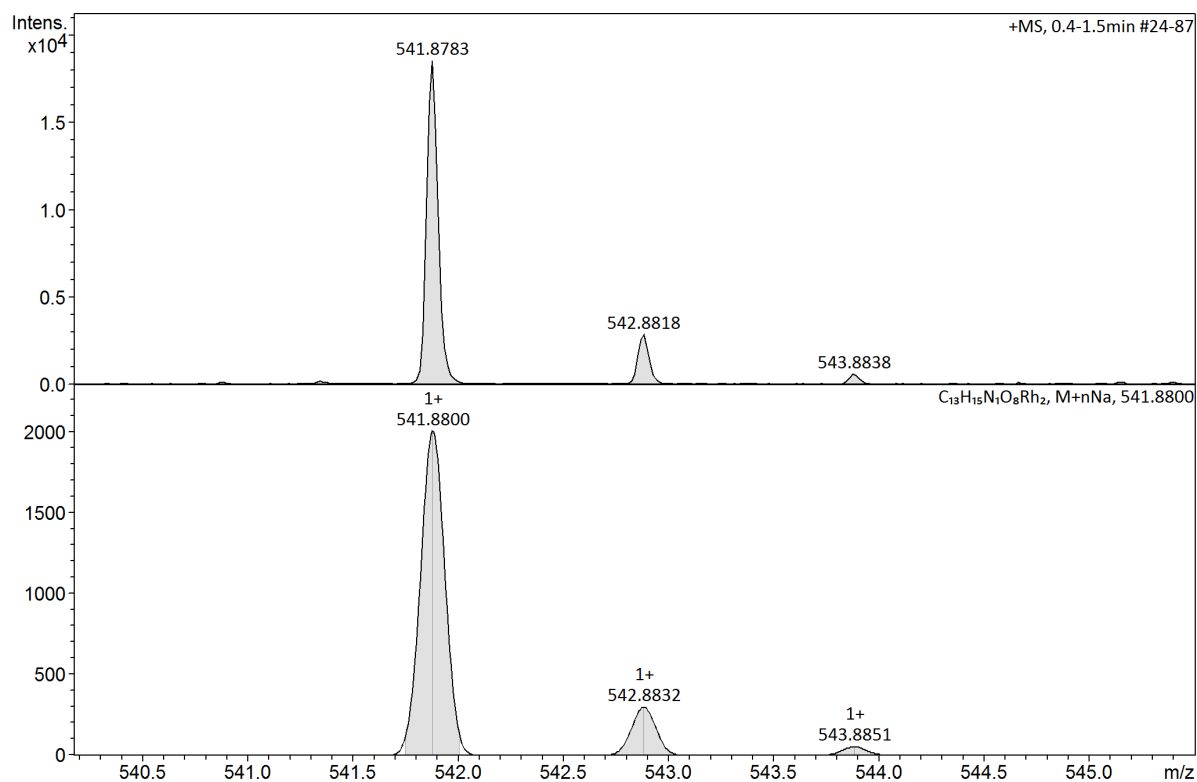

Figure S4. Observed (top) and simulated (down) ESI-TOF-MS spectra of  $[\text{Rh}_2(\text{O}_2\text{CCH}_3)_3(\text{PABC})]$  (**1**).

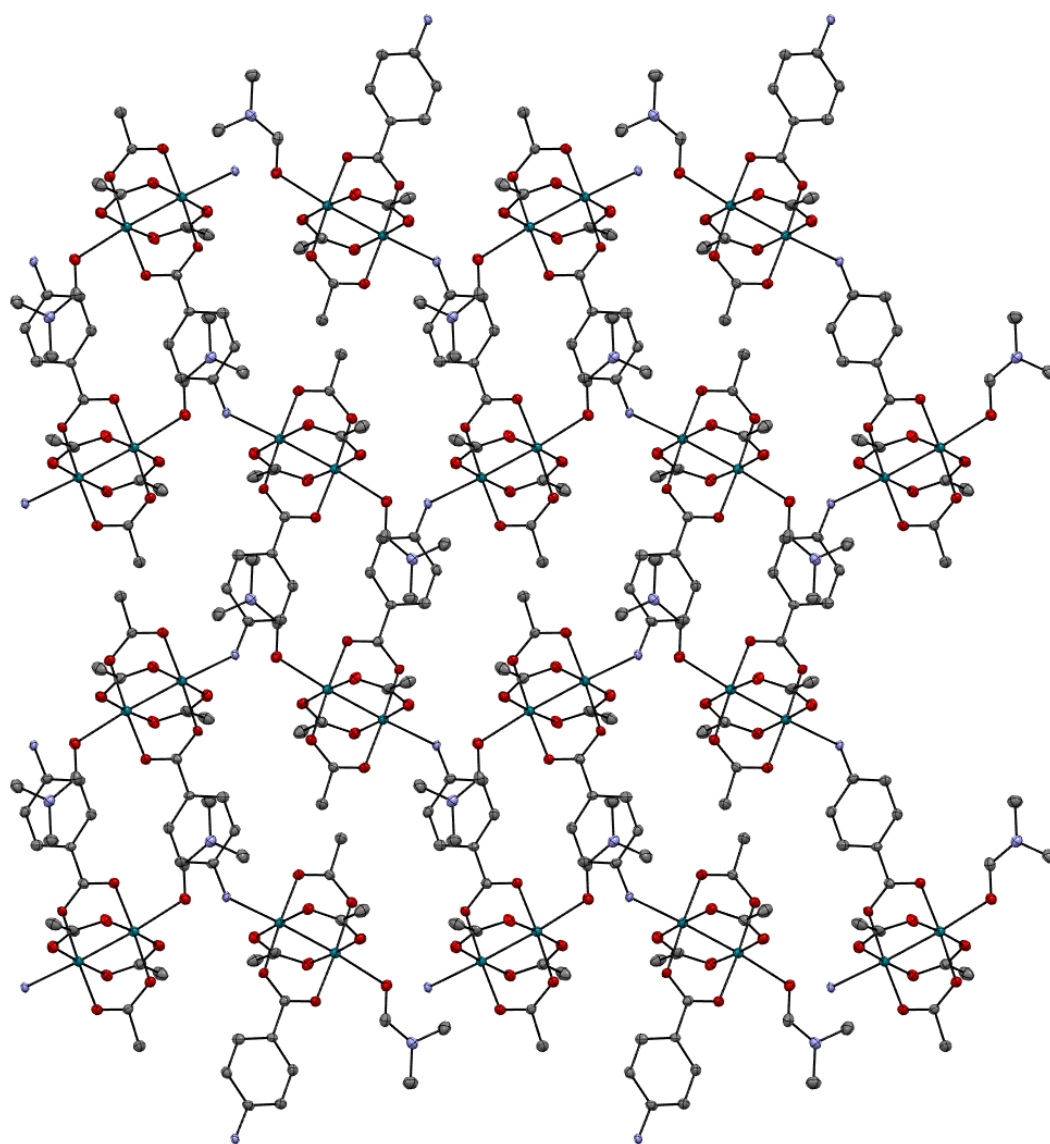

Figure S5. Packing view (along a axis) of crystal structure of  $[\text{Rh}_2(\text{O}_2\text{CCH}_3)_3(\text{PABC})(\text{DMF})]_n$  (**1P**).

Hydrogen atoms are omitted for clarity.

Table S1. Coordinate of optimized geometry of  $[\text{Rh}_2(\text{O}_2\text{CCH}_3)_3(\text{PABC})]$ .

|    |             |             |             |
|----|-------------|-------------|-------------|
| Rh | 0           | 0           | 0           |
| Rh | 0           | 0           | 2.38121138  |
| O  | 2.05160758  | 0           | 0.05765033  |
| O  | 2.0505158   | 0.00113604  | 2.32476207  |
| O  | 0.00109151  | 2.05718748  | 0.05808655  |
| O  | -0.00286575 | 2.05562824  | 2.32418248  |
| O  | -2.05682089 | 0.00235241  | 0.0565767   |
| O  | -2.05892845 | 0.00594686  | 2.32210207  |
| O  | 0.00267541  | -2.05658093 | 0.05731559  |
| O  | -0.00337387 | -2.05795709 | 2.32348758  |
| N  | 8.33676634  | 0.18997002  | 1.18583212  |
| H  | 8.80574159  | -0.12701467 | 2.0276077   |
| H  | 8.80296904  | -0.11880834 | 0.33946141  |
| C  | 2.64615047  | 0.00958283  | 1.19133538  |
| C  | 4.12655108  | 0.0363007   | 1.19095792  |
| C  | 4.84193821  | 0.05626685  | -0.01929742 |
| H  | 4.28825752  | 0.04641398  | -0.95854205 |
| C  | 6.23024677  | 0.08748984  | -0.02476063 |
| H  | 6.77246578  | 0.1063721   | -0.97400593 |
| C  | 6.95369413  | 0.09975489  | 1.18750337  |
| C  | 6.23333177  | 0.07771269  | 2.4014981   |
| H  | 6.77805066  | 0.08847093  | 3.34942826  |
| C  | 4.84487659  | 0.0468107   | 2.39949559  |
| H  | 4.2938862   | 0.02860088  | 3.34024356  |
| C  | 0.00828103  | 2.63948098  | 1.19149232  |
| C  | 0.06153102  | 4.14722707  | 1.19334952  |
| H  | -0.4244996  | 4.54707162  | 0.2938961   |
| H  | 1.11863764  | 4.46015504  | 1.1825371   |
| H  | -0.40608017 | 4.54402801  | 2.10375153  |
| C  | -2.64081898 | -0.0018319  | 1.18896608  |
| C  | -4.14919927 | -0.0481069  | 1.18791302  |
| H  | -4.54592132 | 0.43625199  | 2.08962569  |
| H  | -4.46814317 | -1.10350345 | 1.19475479  |
| H  | -4.54485523 | 0.42504181  | 0.2798828   |
| C  | 0.01209507  | -2.64007382 | 1.19014401  |
| C  | 0.07416108  | -4.1476857  | 1.18845272  |
| H  | -0.39634183 | -4.55033566 | 2.09479642  |
| H  | 1.13324501  | -4.45412276 | 1.18320791  |
| H  | -0.40360999 | -4.54788538 | 0.28473129  |

Table S2. Coordinate of optimized geometry of  $[\text{Rh}_2(\text{O}_2\text{CCH}_3)_3(\text{PABC})(\text{DMF})]$ .

|    |             |             |             |
|----|-------------|-------------|-------------|
| Rh | 0           | 0           | 0           |
| Rh | 0           | 0           | 2.40690251  |
| O  | 2.06348853  | 0           | 0.07131192  |
| O  | 2.05728623  | 0.00430028  | 2.34023434  |
| O  | -0.00333857 | 2.05985053  | 0.0719609   |
| O  | -0.00479395 | 2.05724312  | 2.34112414  |
| O  | -2.06657839 | -0.00972308 | 0.06711644  |
| O  | -2.06419813 | 0.00689476  | 2.33513383  |
| O  | 0.00275522  | -2.07617071 | 0.06416325  |
| O  | -0.00219363 | -2.06994114 | 2.33120934  |
| N  | 8.34843537  | 0.22953498  | 1.22250983  |
| H  | 8.80900117  | -0.11172599 | 2.06001905  |
| H  | 8.81284388  | -0.08575307 | 0.37699813  |
| C  | 2.64812395  | 0.01490259  | 1.20855149  |
| C  | 4.13408124  | 0.05046616  | 1.21080531  |
| C  | 4.85369025  | 0.09126945  | 0.00478658  |
| H  | 4.30154928  | 0.09405689  | -0.93547963 |
| C  | 6.24305795  | 0.13004249  | 0.00421311  |
| H  | 6.78881653  | 0.16656346  | -0.94282327 |
| C  | 6.96217598  | 0.12977867  | 1.21796319  |
| C  | 6.23792508  | 0.08863418  | 2.42794238  |
| H  | 6.77932184  | 0.09096886  | 3.37805914  |
| C  | 4.84868306  | 0.05030672  | 2.42061057  |
| H  | 4.29293339  | 0.01814306  | 3.35820922  |
| C  | 0.00464037  | 2.63599179  | 1.20775496  |
| C  | 0.05734121  | 4.14625569  | 1.20635685  |
| H  | -0.44770841 | 4.54499619  | 0.31663366  |
| H  | 1.11354891  | 4.46068697  | 1.1716754   |
| H  | -0.39191824 | 4.54455297  | 2.12538974  |
| C  | -2.642907   | -0.00643978 | 1.2037371   |
| C  | -4.15433206 | -0.05083738 | 1.20415052  |
| H  | -4.5485561  | 0.43831193  | 2.10455918  |
| H  | -4.47719055 | -1.10512266 | 1.21656825  |
| H  | -4.55184214 | 0.42080665  | 0.29588507  |
| C  | 0.0119498   | -2.65194919 | 1.20493114  |
| C  | 0.07205847  | -4.16278716 | 1.20503393  |
| H  | -0.29207387 | -4.56009076 | 2.16088693  |
| H  | 1.12138326  | -4.47414646 | 1.07221852  |
| H  | -0.51067412 | -4.56946623 | 0.36697552  |
| O  | -0.0119837  | 0.00703667  | -2.24764092 |
| C  | -0.08555162 | -1.07402812 | -2.84855043 |
| N  | -0.14054651 | -1.18213372 | -4.19099414 |
| H  | -0.10951427 | -2.03561903 | -2.30285448 |
| C  | -0.22512545 | -2.47846739 | -4.83809135 |
| H  | -1.14985668 | -2.55926086 | -5.43540585 |
| H  | 0.63481079  | -2.63760521 | -5.51155318 |
| H  | -0.22735383 | -3.27235674 | -4.07837613 |
| C  | -0.12327485 | 0.00203973  | -5.03780975 |
| H  | -0.06260327 | 0.88833892  | -4.39567583 |
| H  | 0.74677239  | -0.02376227 | -5.71567245 |
| H  | -1.04130688 | 0.05013918  | -5.6478016  |

Table S3. Coordinate of optimized geometry of  $[\text{Rh}_2(\text{O}_2\text{CCH}_3)_3(\text{PABC})(\text{DMF})_2]$ .

|    |             |             |             |
|----|-------------|-------------|-------------|
| Rh | 0           | 0           | 0           |
| Rh | 0           | 0           | 2.41797192  |
| O  | 2.06729059  | 0           | 0.07659744  |
| O  | 2.06707225  | 0.00459235  | 2.34547445  |
| O  | -0.00057946 | 2.06971103  | 0.0816717   |
| O  | 0.00353977  | 2.07431012  | 2.34951237  |
| O  | -2.06977514 | -0.00861701 | 0.07204294  |
| O  | -2.07134248 | 0.01646838  | 2.34029194  |
| O  | -0.00237259 | -2.07551659 | 0.06933213  |
| O  | -0.00762251 | -2.07020738 | 2.33711715  |
| O  | -0.00010035 | 0.02436904  | 4.76180143  |
| N  | 8.35861005  | 0.22605349  | 1.20226865  |
| H  | 8.81815897  | -0.1543696  | 2.02384464  |
| H  | 8.81187726  | -0.07857825 | 0.34631849  |
| N  | 0.05821796  | 1.29171476  | 6.66395181  |
| C  | 2.65097935  | 0.01358555  | 1.21072834  |
| C  | 4.14063816  | 0.04806969  | 1.20907668  |
| C  | 4.85383822  | 0.11921633  | 0.0012258   |
| H  | 4.29509872  | 0.14512524  | -0.93483667 |
| C  | 6.24381507  | 0.15849161  | -0.00587097 |
| H  | 6.78431271  | 0.21942017  | -0.95481817 |
| C  | 6.96937503  | 0.12581869  | 1.20277916  |
| C  | 6.25206656  | 0.0522714   | 2.41454403  |
| H  | 6.79930651  | 0.02689995  | 3.36124677  |
| C  | 4.86186071  | 0.01517361  | 2.41366575  |
| H  | 4.31000541  | -0.0449895  | 3.35226718  |
| C  | 0.00967561  | 2.64814286  | 1.20965361  |
| C  | 0.0578845   | 4.16078805  | 1.21104578  |
| H  | -0.25903355 | 4.55676846  | 0.23805728  |
| H  | 1.0945259   | 4.48251642  | 1.40430058  |
| H  | -0.57434358 | 4.55951044  | 2.01698323  |
| C  | -2.64540558 | -0.00273193 | 1.20626052  |
| C  | -4.15855448 | -0.05243398 | 1.20514462  |
| H  | -4.55809745 | 0.41753614  | 2.1134844   |
| H  | -4.47763647 | -1.10795439 | 1.19511346  |
| H  | -4.55642187 | 0.43460874  | 0.30488577  |
| C  | 0.00505576  | -2.64882728 | 1.20930191  |
| C  | 0.05982541  | -4.16145284 | 1.20993763  |
| H  | -0.27478582 | -4.557622   | 2.17697458  |
| H  | 1.10221428  | -4.47789861 | 1.03994265  |
| H  | -0.55265916 | -4.56540816 | 0.39158725  |
| C  | 0.03918585  | 1.12384005  | 5.32059289  |
| H  | 0.06146953  | 2.06815438  | 4.74247939  |
| C  | 0.03284258  | 0.14457304  | 7.55713151  |
| H  | -0.85192273 | 0.1869241   | 8.21567872  |
| H  | 0.93747488  | 0.12617635  | 8.18945314  |
| H  | -0.00685024 | -0.76639851 | 6.94818248  |
| C  | 0.10644038  | 2.61361232  | 7.2568757   |
| H  | -0.77508907 | 2.79216573  | 7.89778685  |
| H  | 0.12181945  | 3.37435325  | 6.46369635  |
| H  | 1.01156299  | 2.73575304  | 7.87782892  |
| O  | -0.01952821 | -0.02946306 | -2.34620676 |
| C  | -0.13989761 | -1.12698062 | -2.89702069 |
| N  | -0.22759942 | -1.29804875 | -4.23733293 |
| H  | -0.18389728 | -2.06718811 | -2.31350663 |
| C  | -0.36714844 | -2.61804813 | -4.81976099 |
| H  | -1.30550395 | -2.69863787 | -5.39663734 |
| H  | 0.47339093  | -2.84154875 | -5.50044827 |
| H  | -0.38124277 | -3.37419086 | -4.02217522 |
| C  | -0.1902221  | -0.15612501 | -5.13671626 |
| H  | -0.09563297 | 0.75491578  | -4.5339521  |
| H  | 0.6687242   | -0.23316623 | -5.82574708 |
| H  | -1.11523673 | -0.10682823 | -5.73691121 |

Table S4. Selected geometrical parameters of optimized geometries of  $[\text{Rh}_2(\text{O}_2\text{CCH}_3)_3(\text{PABC})]$ ,  $[\text{Rh}_2(\text{O}_2\text{CCH}_3)_3(\text{PABC})(\text{DMF})]$ , and  $[\text{Rh}_2(\text{O}_2\text{CCH}_3)_3(\text{PABC})(\text{DMF})_2]$  (**1D**).

| Bond lengths | $[\text{Rh}_2(\text{O}_2\text{CCH}_3)_3(\text{PABC})]$ | $[\text{Rh}_2(\text{O}_2\text{CCH}_3)_3(\text{PABC})(\text{DMF})]$ | $[\text{Rh}_2(\text{O}_2\text{CCH}_3)_3(\text{PABC})(\text{DMF})_2]$ |
|--------------|--------------------------------------------------------|--------------------------------------------------------------------|----------------------------------------------------------------------|
| Rh(1)-Rh(2)  | 2.381                                                  | 2.407                                                              | 2.418                                                                |
| Rh(1)-O(1)   | 2.051                                                  | 2.058                                                              | 2.068                                                                |
| Rh(1)-O(3)   | 2.059                                                  | 2.071                                                              | 2.072                                                                |
| Rh(1)-O(5)   | 2.060                                                  | 2.065                                                              | 2.073                                                                |
| Rh(1)-O(7)   | 2.056                                                  | 2.058                                                              | 2.075                                                                |
| Rh(2)-O(2)   | 2.052                                                  | 2.065                                                              | 2.069                                                                |
| Rh(2)-O(4)   | 2.057                                                  | 2.077                                                              | 2.077                                                                |
| Rh(2)-O(6)   | 2.058                                                  | 2.070                                                              | 2.071                                                                |
| Rh(2)-O(8)   | 2.058                                                  | 2.061                                                              | 2.071                                                                |
| Rh(1)-O(10)  | -                                                      | -                                                                  | 2.346                                                                |
| Rh(2)-O(9)   | -                                                      | 2.248                                                              | 2.344                                                                |

Table S5. Sum of electronic and thermal free energies of optimized geometries of  $[\text{Rh}_2(\text{O}_2\text{CCH}_3)_3(\text{PABC})]$ ,  $[\text{Rh}_2(\text{O}_2\text{CCH}_3)_3(\text{PABC})(\text{DMF})]$ ,  $[\text{Rh}_2(\text{O}_2\text{CCH}_3)_3(\text{PABC})(\text{DMF})_2]$  (**1D**), and DMF.

| Complexes                                                            | Sum of electronic and thermal free energies (a.u.) |
|----------------------------------------------------------------------|----------------------------------------------------|
| $[\text{Rh}_2(\text{O}_2\text{CCH}_3)_3(\text{PABC})(\text{DMF})_2]$ | -1877.026166                                       |
| $[\text{Rh}_2(\text{O}_2\text{CCH}_3)_3(\text{PABC})(\text{DMF})]$   | -1628.573634                                       |
| $[\text{Rh}_2(\text{O}_2\text{CCH}_3)_3(\text{PABC})]$               | -1380.113947                                       |
| DMF                                                                  | -248.450286                                        |
